# Supplementary material for: Microbial Community Structure Drives Predatory Myxobacteria Distribution Under Different Compost Manures
Source: Research Square preprint supplement (doi:10.21203/rs.3.rs-524148/v1), 2021-05-21
Supplement: Supplementary file 1 [file 58929bc6461f128573c526c5.xlsx]

## Sheet: Sheet1
Table S1 One-way ANOVA analysis of physicochemical properties and microbial community diversity under different compost manure treatments.
Variables	Phase
	F	P
OC	313950	<0.001***
NO3--N	105678	<0.001***
NH4+-N	2698533	<0.001***
TN	11329.9	<0.001***
C/N	25.93	<0.001***
TK	26622	<0.001***
pH	8.585	0.003**
TP	11460.8	<0.001***
Ca2+	6373.43	<0.001***
Mg2+	1703.39	<0.001***
Na+	6714.4	<0.001***
Bacterial Shannon index	823.659	<0.001***
myxobacteria Shannon index	101.905	<0.001***
Bacterial Chao1 index	170.891	<0.001***
myxobacteria Chao1 index	27.214	<0.001***
myxobacteria abundance	3.179	0.063
Bacterial abundance	6.993	0.006**
Note: OC, organic carbon; NO3--N, nitrate nitrogen; NH4+-N, ammonia nitrogen; TN, total nitrogen; TP, total phosphorus; C/N, total organic carbon / total nitrogen; TK, total potassium; Ca2+, Calcium ion; Mg2+, Magnesium ions; Na+, Sodium ion. ***P < 0.001; **P < 0.01; *P < 0.05
