# Supplementary material for: Microbial Community Structure Drives Predatory Myxobacteria Distribution Under Different Compost Manures
Source: Research Square preprint supplement (doi:10.21203/rs.3.rs-524148/v1), 2021-05-21
Supplement: Supplementary file 2 [file b5441e816bafa4b63af3f8e6.xlsx]

## Sheet: Sheet1
Table S5 Single factor correlation network node attribute table.
node name	degree	clustering
o__Sphingomonadales	9	0.611111
o__Sphingobacteriales	9	0.583333
o__Flavobacteriales	9	0.611111
o__Caulobacterales	9	0.638889
o__Myxococcales	8	0.678571
o__Acidimicrobiales	8	0.535714
o__Bacillales	8	0.642857
o__Pseudomonadales	8	0.714286
o__Clostridiales	8	0.642857
o__Cellvibrionales	8	0.678571
o__JG30-KF-CM45	8	0.714286
o__Cytophagales	8	0.571429
o__Anaerolineales	7	0.761905
o__Micrococcales	7	0.761905
o__norank_c__Acidobacteria	7	0.666667
o__Burkholderiales	6	0.8
o__Rhizobiales	6	0.666667
o__Rhodospirillales	6	0.533333
o__Bacteroidales	4	1
o__Xanthomonadales	1	0
Note: Node name is the name of the node in the network graph; Degree represents the degree of the node in the network graph, that is, the number of nodes connected to a node; Clustering is the clustering coefficient of the node, which represents the connection between a node and its neighboring nodes.
